# Supplementary material for: Population-Based Risk of Psychiatric Disorders Associated With Recurrent Copy Number Variants
Source: PubMed Central journal article supplement (PMC11209205; doi:10.1001/jamapsychiatry.2024.1453), 2024-06-26
Supplement: jamapsychiatry-e241453-s003.pdf [file jamapsychiatry-e241453-s003.pdf]

\*First name, last name, and suffix (if applicable) are required and will appear in PubMed.

| <b>*Group Name(s): iPSYCH Investigators</b> |                   |                              |                         |                                             |                                                 |                                                                |                                                                                                   |
|---------------------------------------------|-------------------|------------------------------|-------------------------|---------------------------------------------|-------------------------------------------------|----------------------------------------------------------------|---------------------------------------------------------------------------------------------------|
| <b>*First Name and Middle Initial(s)</b>    | <b>*Last Name</b> | <b>*Suffix (eg, Jr, III)</b> | <b>Academic Degrees</b> | <b>Institution</b>                          | <b>Location (city, state/province, country)</b> | <b>Role or Contribution, eg, chair, principal investigator</b> | <b>Group (if more than 1 Group listed in the byline) and/or Subgroup (eg, Steering Committee)</b> |
| Anders D.                                   | Børglum           |                              |                         | Aarhus University                           | Aarhus, Denmark                                 |                                                                |                                                                                                   |
| David M.                                    | Hougaard          |                              |                         | Statens Serum Institute                     | Copenhagen, Denmark                             |                                                                |                                                                                                   |
| Merete                                      | Nordentoft        |                              |                         | Mental Health Centre Copenhagen             | Copenhagen, Denmark                             |                                                                |                                                                                                   |
| Ole                                         | Mors              |                              |                         | Aarhus University Hospital-Psychiatry       | Aarhus, Denmark                                 |                                                                |                                                                                                   |
| Preben B.                                   | Mortensen         |                              |                         | National Centre for Register-Based Research | Aarhus, Denmark                                 |                                                                |                                                                                                   |
| Thomas                                      | Werge             |                              |                         | Institute of Biological Psychiatry          | Roskilde, Denmark                               |                                                                |                                                                                                   |
| Jakob                                       | Grove             |                              |                         | Aarhus University                           | Aarhus, Denmark                                 |                                                                |                                                                                                   |
| Thomas D.                                   | Als               |                              |                         | Aarhus University                           | Aarhus, Denmark                                 |                                                                |                                                                                                   |
| Alfonso                                     | Buil              |                              |                         | Institute of Biological Psychiatry          | Roskilde, Denmark                               |                                                                |                                                                                                   |
| Anders                                      | Rosengren         |                              |                         | Institute of Biological Psychiatry          | Roskilde, Denmark                               |                                                                |                                                                                                   |
| Andrés                                      | Ingason           |                              |                         | Institute of Biological Psychiatry          | Roskilde, Denmark                               |                                                                |                                                                                                   |
| Andrew J.                                   | Schork            |                              |                         | Institute of Biological Psychiatry          | Roskilde, Denmark                               |                                                                |                                                                                                   |
| Dorte                                       | Helenius          |                              |                         | Institute of Biological Psychiatry          | Roskilde, Denmark                               |                                                                |                                                                                                   |
| Jesper                                      | Gådin             |                              |                         | Institute of Biological Psychiatry          | Roskilde, Denmark                               |                                                                |                                                                                                   |
| Richard                                     | Zetterberg        |                              |                         | Institute of Biological Psychiatry          | Roskilde, Denmark                               |                                                                |                                                                                                   |
| Vivek                                       | Appadurai         |                              |                         | Institute of Biological Psychiatry          | Roskilde, Denmark                               |                                                                |                                                                                                   |
| Joeri                                       | Meijssen          |                              |                         | Institute of Biological Psychiatry          | Roskilde, Denmark                               |                                                                |                                                                                                   |
| Kajsa-Lotta                                 | Georgii Hellberg  |                              |                         | Institute of Biological Psychiatry          | Roskilde, Denmark                               |                                                                |                                                                                                   |
| Bjarni J.                                   | Vilhjálmsón       |                              |                         | National Centre for Register-Based Research | Aarhus, Denmark                                 |                                                                |                                                                                                   |
| Carsten B.                                  | Pedersen          |                              |                         | National Centre for Register-Based Research | Aarhus, Denmark                                 |                                                                |                                                                                                   |
| Esben                                       | Agerbo            |                              |                         | National Centre for Register-Based Research | Aarhus, Denmark                                 |                                                                |                                                                                                   |
| Jakob                                       | Christensen       |                              |                         | National Centre for Register-Based Research | Aarhus, Denmark                                 |                                                                |                                                                                                   |
| Liselotte V.                                | Petersen          |                              |                         | National Centre for Register-Based Research | Aarhus, Denmark                                 |                                                                |                                                                                                   |
| Marianne                                    | Gjørtz Pedersen   |                              |                         | National Centre for Register-Based Research | Aarhus, Denmark                                 |                                                                |                                                                                                   |
| Jonas                                       | Byberg-Grauholm   |                              |                         | Statens Serum Institute                     | Copenhagen, Denmark                             |                                                                |                                                                                                   |
| Marie                                       | Bækvad-Hansen     |                              |                         | Statens Serum Institute                     | Copenhagen, Denmark                             |                                                                |                                                                                                   |
