# Supplementary material for: Population-Based Risk of Psychiatric Disorders Associated With Recurrent Copy Number Variants
Source: PubMed Central journal article supplement (PMC11209205; doi:10.1001/jamapsychiatry.2024.1453), 2024-06-26
Supplement: jamapsychiatry-e241453-s004.pdf [file jamapsychiatry-e241453-s004.pdf]

## Data Sharing Statement

Vaez. Population-Based Risk of Psychiatric Disorders Associated With Recurrent Copy Number Variants. *JAMA Psychiatry*. Published June 26, 2024.

doi:10.1001/jamapsychiatry.2024.1453

### Data

**Data available:** No

### Additional Information

**Explanation for why data not available:** Regarding access to study data (other than sensitive person-level data, which by requirement of the data custodian and Danish legislation cannot be shared) please contact the corresponding author.
